# Supplementary material for: Understanding the basis of a novel fruit type in Brassicaceae: conservation and deviation in expression patterns of six genes
Source: PubMed Central journal article supplement (PMC3503883; doi:10.1186/2041-9139-3-20), 2012-09-03
Supplement: 2041-9139-3-20-S6.pdf [file 2041-9139-3-20-S6.pdf]

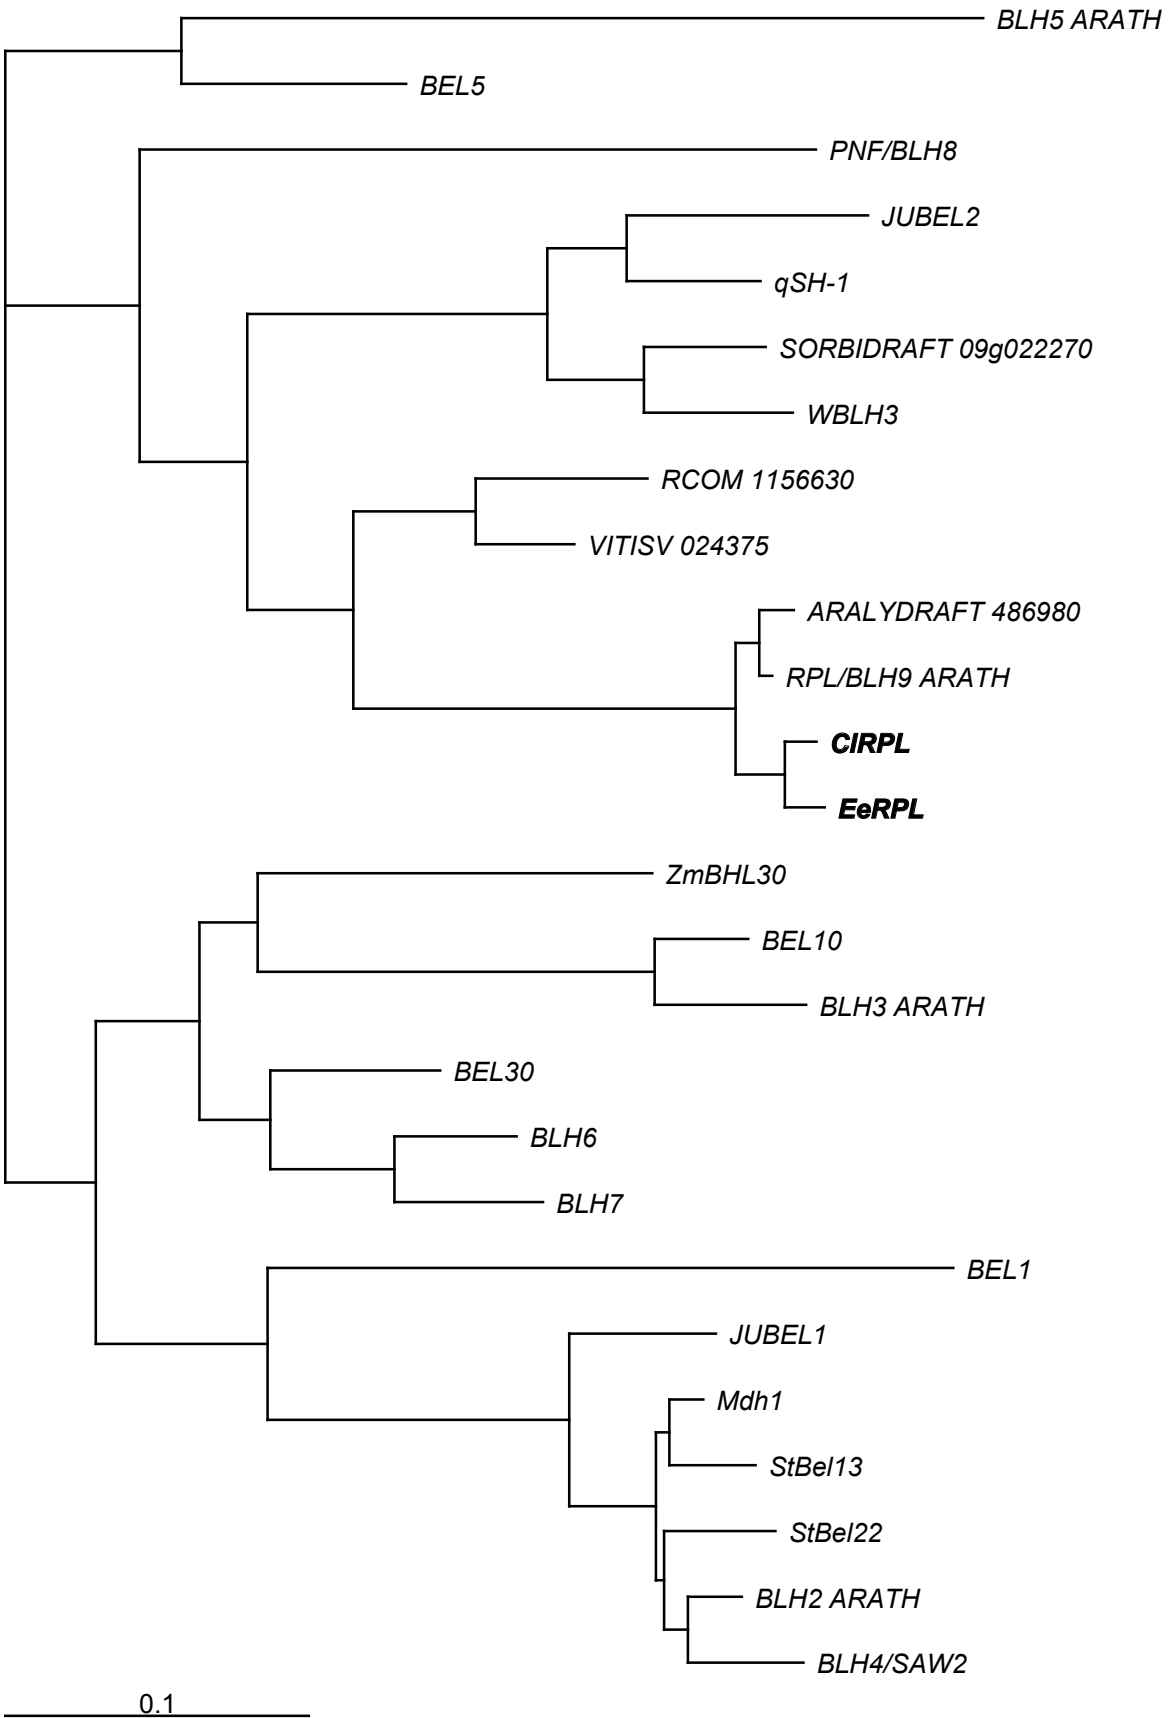

**Figure S4:** Neighbor joining tree of 26 BEL-like genes, including homologs identified from *Cakile* and *Erucaria* (**CIRPL** and **EeRPL** in bold). Taxa names and GenBank accession numbers are provided in Table S2.
